# Supplementary material for: Three new energetic complexes with N,N-bis(1H-tetrazole-5-yl)-amine as high energy density materials: syntheses, structures, characterization and effects on the thermal decomposition of RDX
Source: Royal Society of Chemistry journal article supplement (doi:10.1039/c6dt04439e), 2017-01-01
Supplement: c6dt04439e1.pdf [file c6dt04439e1.pdf]

## Supporting information

**Table S1** Selected bond distances (Å) and angles (°) for **1**

|                     |            |                     |            |
|---------------------|------------|---------------------|------------|
| Pb(1)-N(6)#1        | 2.666(6)   | Pb(1)-N(1) #2       | 2.793(6)   |
| Pb(1)-N(4)#3        | 2.402(6)   | Pb(1)-N(6)#4        | 2.666(6)   |
| Pb(1)-N(1)#5        | 2.793(6)   | Pb(1)-N(1)#3        | 2.567(6)   |
| C(2)-N(6)-Pb(1)#1   | 134.1(4)   | N(7)-N(6)-Pb(1)#1   | 120.5(4)   |
| C(1)-N(1)-Pb(1)#2   | 126.5(4)   | N(2)-N(1)-Pb(1)#2   | 123.0(4)   |
| N(4)#3-Pb(1)-N(9)   | 70.36(18)  | N(4)#3-Pb(1)-N(6)#4 | 77.61(18)  |
| N(9)-Pb(1)-N(6)#4   | 70.87(18)  | N(4)#3-Pb(1)-O(1)   | 79.53(18)  |
| N(9)-Pb(1)-O(1)     | 134.28(17) | N(6)#4-Pb(1)-O(1)   | 69.59(17)  |
| N(4)#3-Pb(1)-N(3)   | 89.20(18)  | N(9)-Pb(1)-N(3)     | 141.37(18) |
| N(6)#4-Pb(1)-N(3)   | 137.77(18) | O(1)-Pb(1)-N(3)     | 68.61(17)  |
| N(4)#3-Pb(1)-N(1)#5 | 93.73(18)  | N(9)-Pb(1)-N(1)#5   | 74.69(17)  |
| N(6)#4-Pb(1)-N(1)#5 | 145.43(18) | O(1)-Pb(1)-N(1)#5   | 142.37(17) |
| N(3)-Pb(1)-N(1)#5   | 74.37(17)  |                     |            |

Symmetry transformations used to generate equivalent atoms:

#1 -x+1,y-1/2,-z+5/2; #2 -x,y+1/2,-z+3/2; #3 -x,-y,-z+2; #4 -x+1,y+1/2,-z+5/2. #5 -x,y-1/2,-z+3/2

**Table S2** Selected bond distances (Å) and angles (°) for **2**

|                  |          |                   |           |
|------------------|----------|-------------------|-----------|
| Pb(1)-O(5)       | 2.371(6) | Pb(1)-O(3)        | 2.485(6)  |
| Pb(1)-O(2)       | 2.536(7) | Pb(1)-N(18)       | 2.573(7)  |
| Pb(1)-O(4)       | 2.593(7) | Pb(1)-H(5B)       | 2.186     |
| Cu(1)-N(6)       | 2.003(7) | Cu(1)-N(14)       | 2.197(12) |
| Cu(1)-N(5)       | 2.014(7) | Cu(1)-N(15)       | 2.019(7)  |
| Cu(1)-O(1)       | 2.203(8) |                   |           |
| O(5)-Pb(1)-O(3)  | 73.5(2)  | O(5)-Pb(1)-O(2)   | 79.4(2)   |
| O(3)-Pb(1)-O(2)  | 83.3(2)  | O(5)-Pb(1)-N(18)  | 73.1(2)   |
| O(3)-Pb(1)-N(18) | 144.7(2) | O(2)-Pb(1)-N(18)  | 79.6(2)   |
| O(5)-Pb(1)-O(4)  | 73.7(2)  | O(3)-Pb(1)-O(4)   | 89.7(2)   |
| O(2)-Pb(1)-O(4)  | 153.1(2) | N(18)-Pb(1)-O(4)  | 91.7(2)   |
| O(4)-Pb(1)-H(5B) | 94.0     | N(6)-Cu(1)-N(14)  | 173.4(3)  |
| N(6)-Cu(1)-N(5)  | 86.5(3)  | N(14)-Cu(1)-N(5)  | 97.7(4)   |
| N(6)-Cu(1)-N(15) | 94.1(3)  | N(14)-Cu(1)-N(15) | 86.8(3)   |
| N(5)-Cu(1)-N(15) | 134.5(3) | N(6)-Cu(1)-O(1)   | 86.3(3)   |
| N(14)-Cu(1)-O(1) | 87.2(3)  | N(5)-Cu(1)-O(1)   | 117.3(4)  |
| N(15)-Cu(1)-O(1) | 108.0(5) |                   |           |

**Table S3** Hydrogen bonding interactions in **2**

| D—H···A              | H···A (Å) | D···A (Å) | D—H···A (Å) | D—H···A (°) |
|----------------------|-----------|-----------|-------------|-------------|
| N(1)-H(1)...N(16)#1  | 0.86      | 2.06      | 2.902(10)   | 164.4       |
| O(6)-H(6A)...N(12)#2 | 0.85      | 2.15      | 2.917(11)   | 150.9       |
| O(5)-H(5A)...N(2)#3  | 0.85      | 2.18      | 2.831(10)   | 133.5       |
| O(7)-H(7A)...N(13)#2 | 0.85      | 2.13      | 2.927(10)   | 157.6       |
| O(7)-H(7B)...N(3)#3  | 0.84      | 1.96      | 2.786(9)    | 165.7       |
| O(2)-H(2A)...N(4)#4  | 0.85      | 2.19      | 2.848(10)   | 133.9       |
| O(3)-H(3A)...O(7)#5  | 0.85      | 2.04      | 2.742(9)    | 139.7       |
| O(4)-H(4B)...N(7)#6  | 0.85      | 2.03      | 2.881(11)   | 179.8       |
| O(1)-H(1A)...N(11)#2 | 0.85      | 2.02      | 2.858(10)   | 170.5       |
| O(4)-H(4A)...N(17)#7 | 0.85      | 2.02      | 2.840(10)   | 162.8       |
| N(1)-H(1)...N(16)#1  | 0.86      | 2.06      | 2.902(10)   | 164.4       |
| N(10)-H(2)...O(2)    | 0.86      | 2.06      | 2.877(9)    | 159.2       |
| O(2)-H(2A)...N(13)#4 | 0.85      | 2.40      | 3.080(10)   | 137.7       |
| O(2)-H(2A)...N(4)#4  | 0.85      | 2.19      | 2.848(10)   | 133.9       |
| O(2)-H(2B)...O(7)    | 0.85      | 1.97      | 2.670(9)    | 139.4       |
| O(5)-H(5A)...N(2)#3  | 0.85      | 2.18      | 2.831(10)   | 133.5       |
| O(5)-H(5A)...N(3)#3  | 0.85      | 2.61      | 3.437(10)   | 164.5       |
| O(5)-H(5B)...O(6)    | 0.85      | 2.02      | 2.681(9)    | 133.7       |
| O(3)-H(3A)...O(7)#5  | 0.85      | 2.04      | 2.742(9)    | 139.7       |
| O(3)-H(3B)...N(8)#6  | 0.85      | 2.28      | 2.748(10)   | 114.9       |
| O(4)-H(4A)...N(17)#7 | 0.85      | 2.02      | 2.840(10)   | 162.8       |
| O(4)-H(4A)...N(16)#7 | 0.85      | 2.67      | 3.499(10)   | 165.5       |
| O(4)-H(4B)...N(7)#6  | 0.85      | 2.03      | 2.881(11)   | 179.8       |
| O(6)-H(6A)...N(12)#2 | 0.85      | 2.15      | 2.917(11)   | 150.9       |
| O(7)-H(7A)...N(13)#2 | 0.85      | 2.13      | 2.927(10)   | 157.6       |
| O(7)-H(7B)...N(3)#3  | 0.84      | 1.96      | 2.786(9)    | 165.7       |
| O(6)-H(6B)...O(4)#6  | 0.85      | 2.17      | 2.962(11)   | 154.1       |

Symmetry transformations used to generate equivalent atoms:

#1 -x+1,-y,-z+1; #2 -x+1,-y+1,-z+2; #3 x,y+1,z; #4 -x+2,-y+1,-z+2; #5 -x+2,-y+2,-z+2; #6 -x+1,-y+1,-z+1; #7 -x+2,-y+1,-z+1.

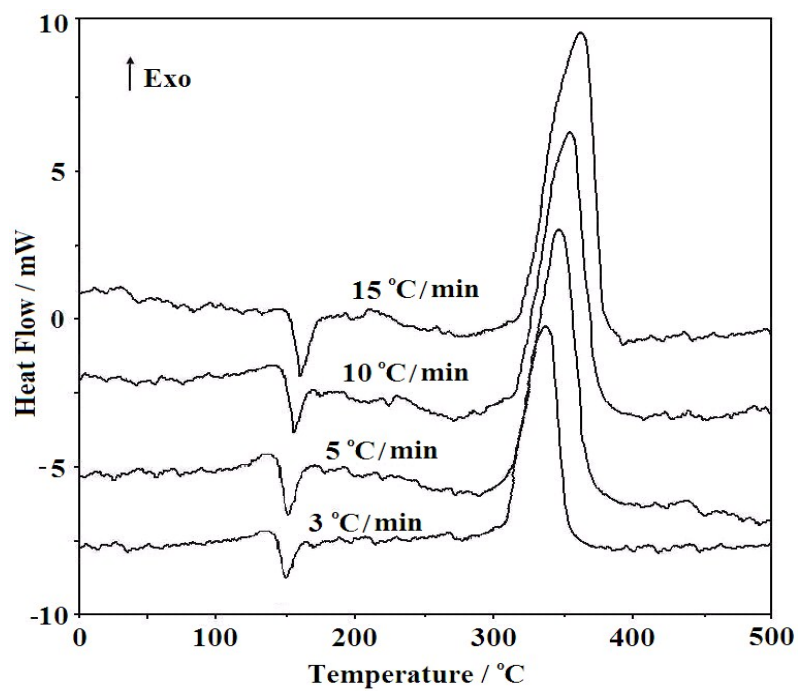

Figure S1. DSC curves of **1** at four different heating rate.

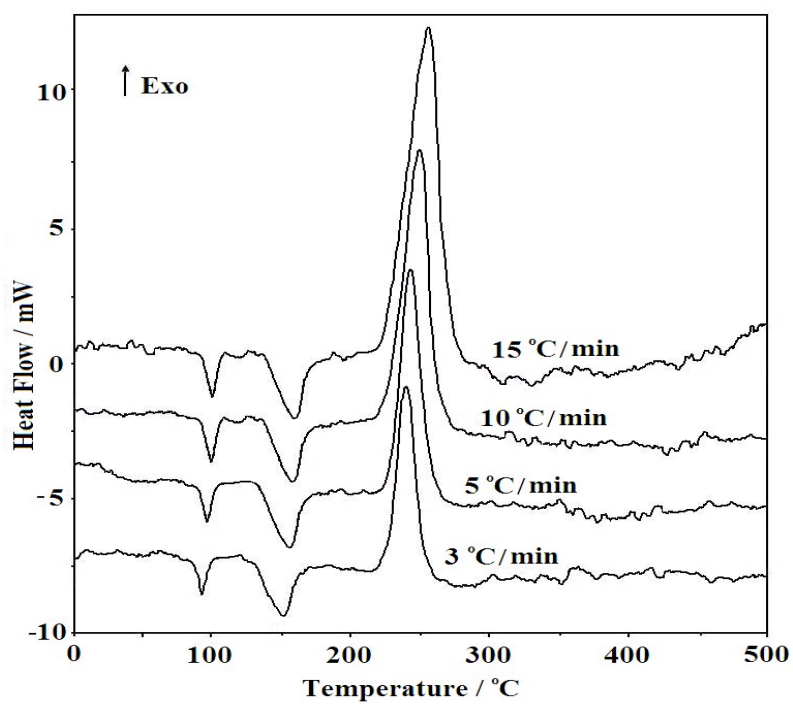

Figure S2. DSC curves of **2** at four different heating rate.
